# Supplementary material
Source: PeerJ journal article supplement (doi:10.7717/peerj-cs.3768)
Supplement: Supplementary_Material1.pdf [file Supplementary_Material1.pdf]

# Supplementary Material — Topology-guided patch extraction (TDA)

## 1. Overview

This document describes the topology-driven steps used to select tumor-centered patches from raw MRI intensities. The pipeline:

1. constructs a **cubical complex** from volumetric intensities,
2. induces an **intensity filtration** (sublevel or superlevel),
3. computes **persistent homology** to obtain a persistence diagram (PD) with spatial representatives,
4. converts the PD into a **persistence image (PI)** or voxelwise lifetime map,
5. thresholds & refines the PI to obtain candidate regions,
6. applies **connected component analysis (CCA)** and ranks components, and
7. uses component centroids to define patch coordinates (with fallbacks).

This file documents the mathematical choices, the main parameters, recommended defaults, and pseudocode plus implementation notes.

## 2. Key implementation choices & recommended defaults

1. **Filtration type**
  - Use **sublevel** filtration when lesions appear darker than background; use **superlevel** if lesions appear brighter (FLAIR, T1ce usually bright → superlevel recommended).
  - Default for this work: **superlevel filtration** on FLAIR and T1ce modalities (so large intensities appear earlier).
2. **Cubical complex construction**
  - Use a cubical complex API (e.g., GUDHI's `CubicalComplex`, Cubical Ripser or equivalent) built directly from the voxel intensity array.
  - For memory saving, you may downsample or compute PH on a smoothed/denoised version (e.g., Gaussian sigma 1–2).
3. **Smoothing / prefilter**
  - Gaussian smoothing (sigma = 1–3) often helps remove spurious small features.
  - We used `sigma = 1.0` as default for 3D arrays; increase if noisy.
4. **Persistence computation**
  - Compute  $H_0, H_1, H_2$  as available; usually  $H_0, H_2$  are most informative in Brain MRI (connected components and cavities).
  - Limit to features with lifetime above a small epsilon to remove numerical artifacts (e.g., lifetime > 1e-4 in normalized intensity units).
5. **Max lifetime clipping (for visualization/PI)**

- Clip lifetimes at a quantile (e.g., 0.8) to avoid domination by a few extreme features. Default: `max_life = quantile(lifetimes, 0.8)`.
- 6. **Persistence-to-spatial mapping**
  - If PH output includes spatial representatives, build a voxelwise **lifetime map**  $L(x, y, z)$  where each representative adds its (clipped) lifetime to the voxel(s) indicating the feature location. If PH representatives are single coordinates, set  $L(\text{coord}) = \max(L(\text{coord}), \text{lifetime})$
  - Alternative (no representatives available): compute a persistence image (PI) from PD and then **project PI back** to voxels by placing Gaussian kernels centered on candidate voxel positions found by intensity-based saliency (hybrid approach). This is less precise but usable.
- 7. **Saliency thresholding**
  - Two recommended strategies:
    - **Percentile thresholding**: select voxels with L above the 90th (or 95th) percentile.
    - **Otsu / Yen threshold** on the L distribution.
  - Default: `saliency_threshold = percentile(L, 95)`.
- 8. **CCA and component ranking parameters**
  - Minimum component volume (`min_voxels`) to ignore tiny noise components: default `min_voxels = 100` (adjust for resolution).
  - Ranking score: `score = lifetime_mean * volume` or `score = max_lifetime * volume^(0.5)`. Default uses `score = mean_lifetime * volume`.
- 9. **Centroid computation**
  - Use persistence-weighted centroid: centroid  $c = \frac{\sum_i w_i x_i}{\sum_i w_i}$  where  $w_i = L(x_i)$  within component.
  - This reduces sensitivity to irregular shapes.
- 10. **Fallbacks**
  - If no components survive thresholding, fall back to center-crop or intensity-based maximum.

### 3. Data formats and convention used in the provided `vec` function

The `vec` function in your code expects an array `ph` whose rows have the format:

```
[dim, birth, death, x, y, z]
```

- `dim`: homology dimension (0,1,2)
- `birth, death`: filtration values (float)
- `x, y, z`: integer voxel coordinates indicating a spatial representative

**Documented expectation:** PH computation must provide representative coordinates for each persistent feature (e.g., location of birth or a representative simplex). If your PH library outputs

only (dim, birth, death) without spatial coordinates, you must obtain representatives explicitly (if the library supports them).

## 4. Pseudocode

INPUTS:

```
Volumes = {V_m} for m in modalities (e.g., FLAIR, T1ce)
patch_size = (Px,Py,Pz) # e.g., (128,128,128)
k = number of patches per subject (default 1)
prefilter_sigma = 1.0
max_life_quantile = 0.8
saliency_percentile = 95
min_component_voxels = 100
```

FOR each subject:

```
# 1. Preprocess volumes
for each modality m:
    Vm = gaussian_smooth(Volumes[m], sigma=prefilter_sigma)
    if modality indicates bright lesion: use superlevel filtration else
    sublevel

# 2. Build cubical complex (from Vm)
K = CubicalComplex(top_dimensional_cells=Vm)

# 3. Compute persistent homology with spatial representatives
PD_with_repr = compute_persistent_homology(K, dims=[0,1,2],
return_representatives=True)
# PD_with_repr is list of tuples (dim,birth,death,x,y,z)

# 4. Convert PD to a modality-level voxel lifetime map Lm(x,y,z)
max_life = quantile( PD_lifetimes, max_life_quantile )
initialize Lm = zeros_like(Vm)
for each feature f in PD_with_repr:
    dim, b, d, x, y, z = f
    life = min(d - b, max_life)
    Lm[x,y,z] = max(Lm[x,y,z], life) # take max to represent strongest
feature

# 5. Fuse modality-level lifetimes into S(x,y,z)
S = fuse( {Lm} ) # e.g., S = sum(Lm over modalities) or pointwise max

# 6. Threshold S to binary saliency_mask
T = percentile(S, saliency_percentile)
saliency_mask = S > T

# 7. Connected-component analysis (CCA) on saliency_mask
components = connected_components(saliency_mask)
filtered_components = [c for c in components if volume(c) >=
min_component_voxels]

if filtered_components empty:
    centers = fallback_centers(Volumes) # center-crop or global max-
intensity centroid
else:
    # 8. Rank components
```

```

scored = []
for comp in filtered_components:
    comp_lifetimes = S[comp_voxels]
    comp_volume = len(comp_voxels)
    score = mean(comp_lifetimes) * comp_volume
    centroid = weighted_centroid(comp_voxels, weights=comp_lifetimes)
    scored.append( (score, centroid, comp) )

sort scored descending by score
centers = [centroid for top k scored entries]

# 9. Extract patches at centers across all modalities
patches = [ crop_volume_at_center(Volumes, c, patch_size) for c in centers
]

# 10. For training: crop corresponding segmentation masks at same centers -
> label patches
# For inference: proceed with patches only (no masks)

# 11. Save patches, centers, and metadata (scores, component volumes,
thresholds)

```

## 5. Recommendations for libraries & representative extraction

- **Cubical Ripser** : supports `CubicalComplex` and `persistence()` and also give spatial representatives.
- **GUDHI**: supports `CubicalComplex` and `persistence()`; recent versions allow retrieving representatives (check library docs).
- **Dionysus / Ripser / Dipha**: popular PH libraries; some require additional work to extract spatial representatives.
- If representatives are not available in your chosen library, options are:
  - compute PH on *localized regions* (sliding windows) and assign lifetime to center voxel,
  - compute PI from PD and combine with intensity-based candidate voxels to project PI back,
  - use morphological maxima on smoothed intensity as proxy seeds and weight by local persistence (hybrid method).

## 6. Sensitivity & robustness guidelines

- **Centroid sensitivity**: use persistence-weighted centroids to reduce sensitivity to irregular shapes. Test with synthetic shifts ( $\pm 5$  voxels) to estimate effect on downstream Dice.
- **Threshold selection**: report results for a small grid of percentile thresholds (90, 95, 99) in ablation to show robustness.
- **Component volume min**: choose `min_voxels` relative to voxel spacing (e.g., at 1 mm<sup>3</sup>, 100 voxels  $\sim$  0.1 cc).
- **Multi-focal cases**: allow  $k > 1$  and extract top-k centroids for multi-focal coverage.
